# Supplementary material
Source: MDPI journal article supplement (https://www.mdpi.com/2227-9717/9/6/1023)
Supplement: s1 [file s1]

Supporting information

## CO<sub>2</sub> absorption mechanism by diamino protic ionic liquids (DPILs) containing azolide anions

Xiao Wang,<sup>1</sup> Congyi Wu,<sup>2</sup> Dezhong Yang\*<sup>2</sup>

<sup>1</sup> School of Earth Sciences and Resources, China University of Geosciences, Beijing 100083, China

<sup>2</sup> School of Science, China University of Geosciences, Beijing 100083, China

Email: yangdz@cugb.edu.cn

**Table S1.** CO<sub>2</sub> capacities by DPILs.

| DPILs        | g CO <sub>2</sub> /g IL   |              |
|--------------|---------------------------|--------------|
|              | Oncsik <i>et al.</i>      | This work    |
| [DMEDAH][Py] | 0.222 (0.79) <sup>a</sup> | 0.231 (0.82) |
| [DMEDAH][Im] | 0.212 (0.75)              | 0.216 (0.77) |
| [DMEDAH][Tz] | 0.197 (0.70)              | 0.190 (0.68) |

<sup>a</sup> The values in the parentheses were molar absorption capacities of ILs (mol CO<sub>2</sub>/ mol IL)

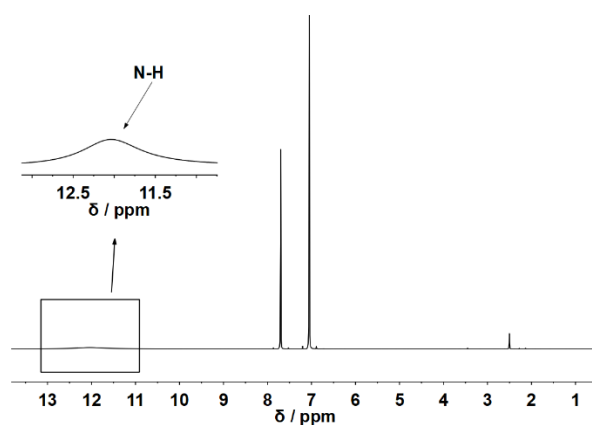**Figure S1.** <sup>1</sup>H NMR spectra of imidazole in DMSO-d<sub>6</sub>.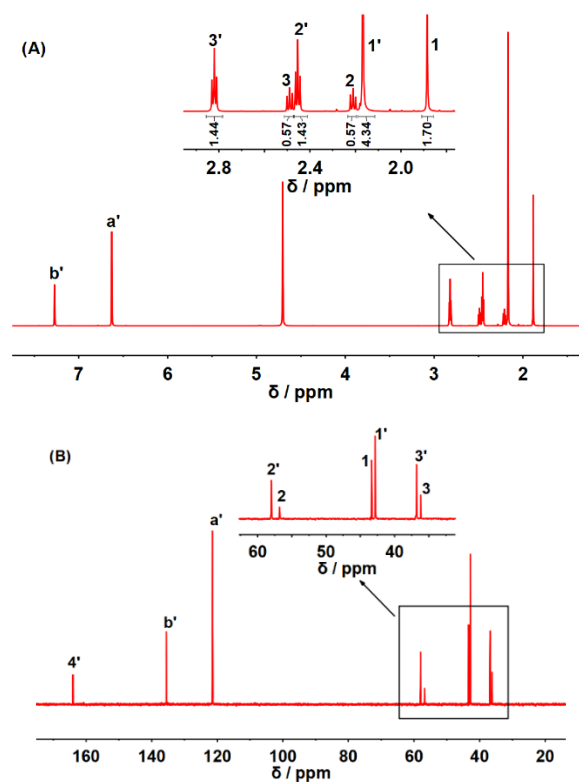**Figure S2.** <sup>1</sup>H (A) and <sup>13</sup>C (B) NMR spectra of [DMEDAH][Im] after CO<sub>2</sub> absorption; D<sub>2</sub>O was used as the internal solvent to record the spectra.

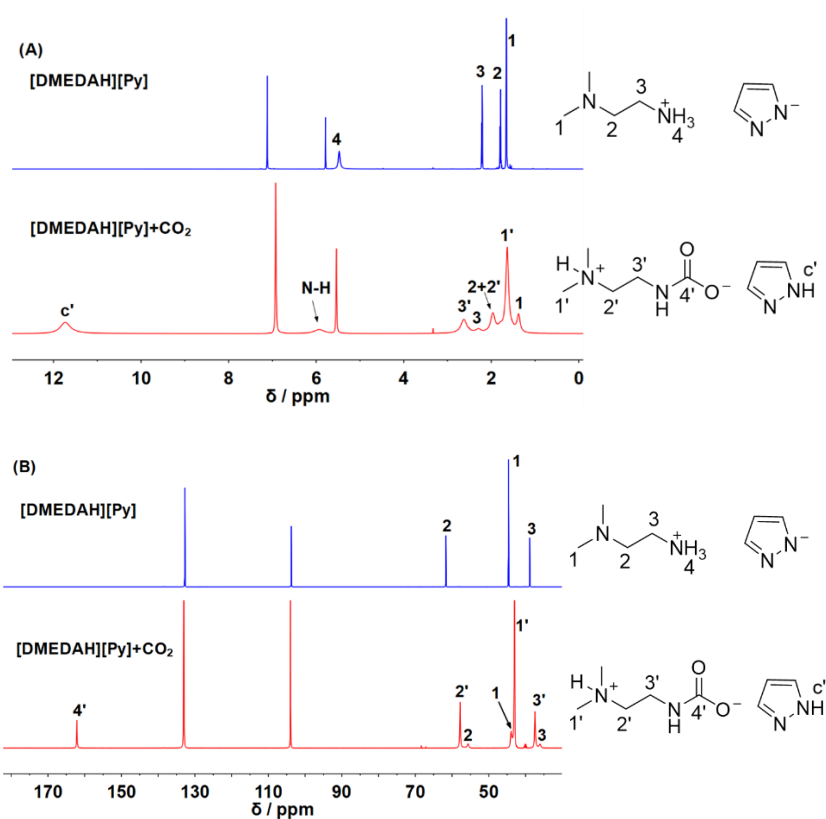

**Figure S3.**  $^1\text{H}$  (A) and  $^{13}\text{C}$  (B) NMR spectra of [DMEDAH][Py] before and after  $\text{CO}_2$  absorption; DMSO- $\text{d}_6$  was used as the external solvent.

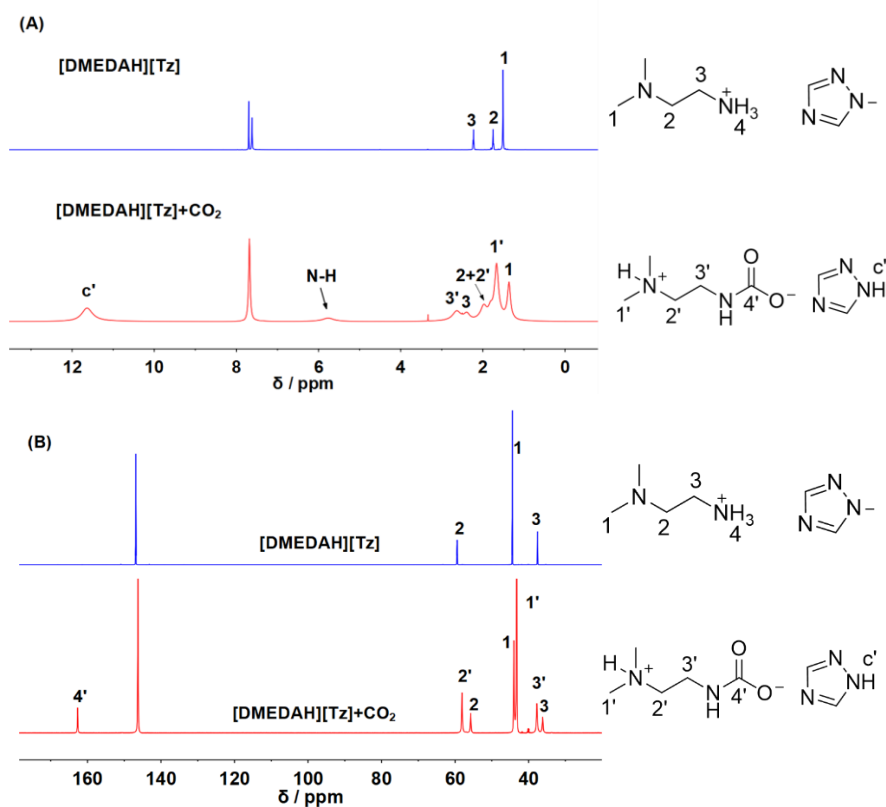

**Figure S4.**  $^1\text{H}$  (A) and  $^{13}\text{C}$  (B) NMR spectra of [DMEDAH][Tz] before and after  $\text{CO}_2$  absorption; DMSO- $\text{d}_6$  was used as the external solvent.

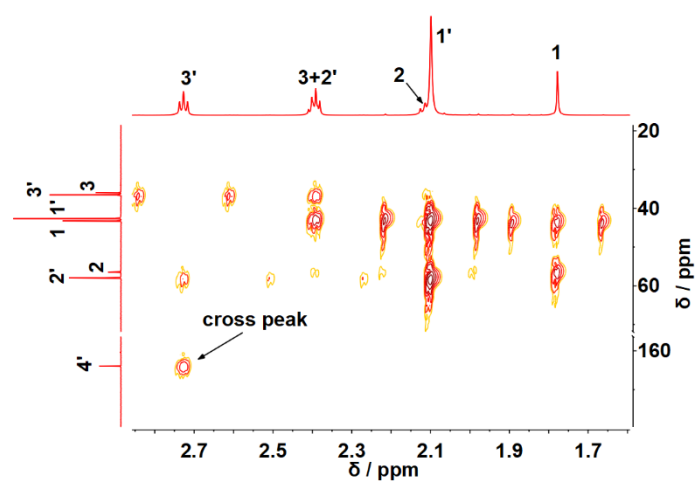

**Figure S5.** The  $^1\text{H}$ - $^{13}\text{C}$  HMBC spectra of [DMEDAH][Py] after  $\text{CO}_2$  capture;  $\text{D}_2\text{O}$  was used as the internal solvent to record the spectra.

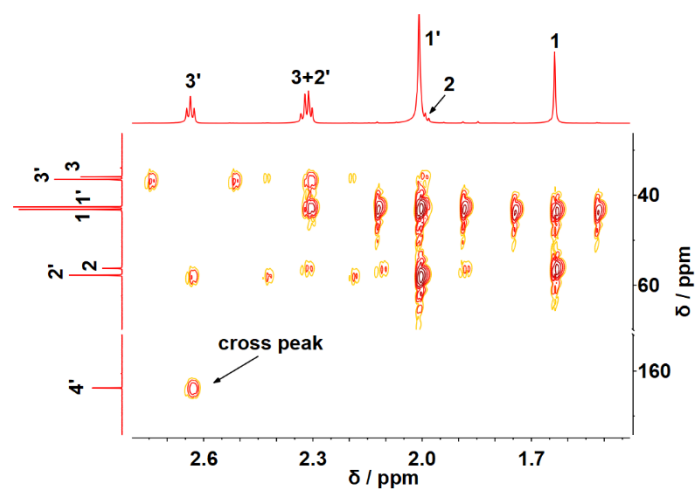

**Figure S6.** The  $^1\text{H}$ - $^{13}\text{C}$  HMBC spectra of [DMEDAH][Tz] after  $\text{CO}_2$  capture;  $\text{D}_2\text{O}$  was used as the internal solvent to record the spectra.
